# Supplementary material
Source: PubMed Central journal article supplement (PMC7422715)
Supplement: pmed.1002975.s004.pdf [file pmed.1002975.s004.pdf]

## Current Situation and Progress towards the 2030 Health-Related Sustainable Development Goals in China: A Systematic Analysis

### Supporting Information File 1

## STROBE Checklist

### STROBE Statement

Current Situation and Progress towards the 2030 Health-Related Sustainable Development Goals in China:

A Systematic Analysis (China SDG study)

|                      | Item No. | Recommendations                                                                                                                 | China SDG Study                                                                                                                                                                                 |
|----------------------|----------|---------------------------------------------------------------------------------------------------------------------------------|-------------------------------------------------------------------------------------------------------------------------------------------------------------------------------------------------|
| Title and abstract   | 1        | (a) Indicate the study's design with a commonly used term in the title or the abstract;                                         | The study design "a systematic analysis" is contained in the title.                                                                                                                             |
|                      |          | (b) Provide in the abstract an informative and balanced summary of what was done                                                | The abstract summarizes the background, methods and findings and conclusions of the study.                                                                                                      |
| Introduction         |          |                                                                                                                                 |                                                                                                                                                                                                 |
| Background/rationale | 2        | Explain the scientific background and rationale for the investigation being reported                                            | The five paragraphs of the Introduction well explain the scientific background and rational for this study.                                                                                     |
| Objectives           | 3        | State specific objectives, including any prespecified hypotheses                                                                | The objectives can be found in the last paragraph of the Introduction session.                                                                                                                  |
| Methods              |          |                                                                                                                                 |                                                                                                                                                                                                 |
| Study design         | 4        | Present key elements of study design early in the paper                                                                         | The key elements of study design are presented in the first and second sub-section of the Methods.                                                                                              |
| Setting              | 5        | Describe the setting, locations, and relevant dates, including periods of recruitment, exposure, follow-up, and data collection | They are described in the first sub-section of the Methods. Note that the study uses secondary panel data (group level) for analysis and therefore does not involve recruitment, follow-up etc. |

|                              |    |                                                                                                                                                                                                                                                                                                                                                                                                                                                |                                                                                                                                                                                                                                                                                                                                  |
|------------------------------|----|------------------------------------------------------------------------------------------------------------------------------------------------------------------------------------------------------------------------------------------------------------------------------------------------------------------------------------------------------------------------------------------------------------------------------------------------|----------------------------------------------------------------------------------------------------------------------------------------------------------------------------------------------------------------------------------------------------------------------------------------------------------------------------------|
| Participants                 | 6  | (a) Cohort study—Give the eligibility criteria, and the sources and methods of selection of participants. Describe methods of follow-up<br>Case-control study—Give the eligibility criteria, and the sources and methods of case ascertainment and control selection. Give the rationale for the choice of cases and controls<br>Cross-sectional study—Give the eligibility criteria, and the sources and methods of selection of participants | The study uses secondary panel data (group level) for analysis and therefore does not involve selection of participants for quantitative data collection.<br><br>The selection of key informants for qualitative data collection is described in the second paragraph of the first sub-section, Sources of Data, of the Methods. |
|                              |    | (b) Cohort study—For matched studies, give matching criteria and number of exposed and unexposed<br>Case-control study—For matched studies, give matching criteria and the number of controls per case                                                                                                                                                                                                                                         | N/A                                                                                                                                                                                                                                                                                                                              |
| Variables                    | 7  | Clearly define all outcomes, exposures, predictors, potential confounders, and effect modifiers. Give diagnostic criteria, if applicable                                                                                                                                                                                                                                                                                                       | The key variables of the study are the SDG indicators and the attainment index which are described in the second, third and fourth sub-section of the Methods.                                                                                                                                                                   |
| Data sources/<br>measurement | 8  | For each variable of interest, give sources of data and details of methods of assessment (measurement). Describe comparability of assessment methods if there is more than one group                                                                                                                                                                                                                                                           | Described in the first, second and last sub-section of the Methods.                                                                                                                                                                                                                                                              |
| Bias                         | 9  | Describe any efforts to address potential sources of bias                                                                                                                                                                                                                                                                                                                                                                                      | Described in the last sub-section, Data quality and methodology robustness, of the Methods.                                                                                                                                                                                                                                      |
| Study size                   | 10 | Explain how the study size was arrived at                                                                                                                                                                                                                                                                                                                                                                                                      | N/A                                                                                                                                                                                                                                                                                                                              |
| Quantitative variables       | 11 | Explain how quantitative variables were handled in the analyses. If applicable, describe which groupings were chosen and why                                                                                                                                                                                                                                                                                                                   | Explained in the second, third, fourth and fifth sub-section of the Methods.                                                                                                                                                                                                                                                     |
| Statistical methods          | 12 | (a) Describe all statistical methods, including those used to control for confounding                                                                                                                                                                                                                                                                                                                                                          | Described the projection methods in the third sub-section of the Methods and appendix.                                                                                                                                                                                                                                           |
|                              |    | (b) Describe any methods used to examine subgroups and interactions                                                                                                                                                                                                                                                                                                                                                                            | N/A                                                                                                                                                                                                                                                                                                                              |
|                              |    | (c) Explain how missing data were addressed                                                                                                                                                                                                                                                                                                                                                                                                    | N/A                                                                                                                                                                                                                                                                                                                              |
|                              |    | (d) Cohort study—If applicable, explain how loss to follow-up was addressed<br>Case-control study—If applicable, explain how matching of cases and controls was addressed                                                                                                                                                                                                                                                                      | N/A                                                                                                                                                                                                                                                                                                                              |

|                  |    |                                                                                                                                                                                                              |                                                                                                         |
|------------------|----|--------------------------------------------------------------------------------------------------------------------------------------------------------------------------------------------------------------|---------------------------------------------------------------------------------------------------------|
|                  |    | Cross-sectional study—If applicable, describe analytical methods taking account of sampling strategy                                                                                                         |                                                                                                         |
|                  |    | (e) Describe any sensitivity analyses                                                                                                                                                                        | N/A                                                                                                     |
| Results          |    |                                                                                                                                                                                                              |                                                                                                         |
| Participants     | 13 | (a) Report numbers of individuals at each stage of study—eg numbers potentially eligible, examined for eligibility, confirmed eligible, included in the study, completing follow-up, and analysed            | N/A                                                                                                     |
|                  |    | (b) Give reasons for non-participation at each stage                                                                                                                                                         | N/A                                                                                                     |
|                  |    | (c) Consider use of a flow diagram                                                                                                                                                                           | N/A                                                                                                     |
| Descriptive data | 14 | (a) Give characteristics of study participants (eg demographic, clinical, social) and information on exposures and potential confounders                                                                     | N/A                                                                                                     |
|                  |    | (b) Indicate number of participants with missing data for each variable of interest                                                                                                                          |                                                                                                         |
|                  |    | (c) Cohort study—Summarise follow-up time (eg, average and total amount)                                                                                                                                     |                                                                                                         |
| Outcome data     | 15 | Cohort study—Report numbers of outcome events or summary measures over time                                                                                                                                  | The SDG indicators are presented in Table 1.                                                            |
|                  |    | Case-control study—Report numbers in each exposure category, or summary measures of exposure                                                                                                                 |                                                                                                         |
|                  |    | Cross-sectional study—Report numbers of outcome events or summary measures                                                                                                                                   |                                                                                                         |
| Main results     | 16 | (a) Give unadjusted estimates and, if applicable, confounder-adjusted estimates and their precision (eg, 95% confidence interval). Make clear which confounders were adjusted for and why they were included | Presented in Table 2, 3 and Figure 1 and 2 and throughout the results section by seven thematic topics. |
|                  |    | (b) Report category boundaries when continuous variables were categorized                                                                                                                                    | N/A                                                                                                     |
|                  |    | (c) If relevant, consider translating estimates of relative risk into absolute risk for a meaningful time period                                                                                             | N/A                                                                                                     |

|                   |    |                                                                                                                                                                            |                                                                        |
|-------------------|----|----------------------------------------------------------------------------------------------------------------------------------------------------------------------------|------------------------------------------------------------------------|
| Other analyses    | 17 | Report other analyses done—eg analyses of subgroups and interactions, and sensitivity analyses                                                                             | N/A                                                                    |
| Discussion        |    |                                                                                                                                                                            |                                                                        |
| Key results       | 18 | Summarise key results with reference to study objectives                                                                                                                   | Summarized in the first sub-section of the Discussion.                 |
| Limitations       | 19 | Discuss limitations of the study, taking into account sources of potential bias or imprecision. Discuss both direction and magnitude of any potential bias                 | Discussed in paragraph 2-7 of the third sub-section of the Discussion. |
| Interpretation    | 20 | Give a cautious overall interpretation of results considering objectives, limitations, multiplicity of analyses, results from similar studies, and other relevant evidence | Interpreted in the fourth and fifth sub-section of the Discussion.     |
| Generalizability  | 21 | Discuss the generalisability (external validity) of the study results                                                                                                      | N/A                                                                    |
| Other information |    |                                                                                                                                                                            |                                                                        |
| Funding           | 22 | Give the source of funding and the role of the funders for the present study and, if applicable, for the original study on which the present article is based              | Presented in the third paragraph of the Acknowledgement.               |
